# Supplementary material
Source: PubMed Central journal article supplement (PMC307584)
Supplement: pnas_100_26_15428__12.pdf [file pnas_100_26_15428__12.pdf]

**Average sequence identity**

(E.coli vs. B.subtilis, orthologs only, best hit within orthologous group)

ecoli/subtilis  
groups

|        |        |   |                                                             |     |
|--------|--------|---|-------------------------------------------------------------|-----|
| 56.76% | 62.01% | J | Translation, ribosomal structure and biogenesis             | 124 |
|        | 54.56% | K | Transcription                                               | 57  |
|        | 49.85% | L | DNA replication, recombination and repair                   | 76  |
| 48.93% | 52.13% | D | Cell division and chromosome partitioning                   | 15  |
|        | 50.84% | O | Posttranslational modification, protein turnover, chaperons | 46  |
|        | 46.15% | M | Cell envelope biogenesis, outer membrane                    | 64  |
|        | 51.05% | N | Cell motility and secretion                                 | 55  |
|        | 48.16% | P | Inorganic ion transport and metabolism                      | 67  |
|        | 48.20% | T | Signal transduction mechanisms                              | 32  |
| 51.46% | 50.15% | C | Energy production and conversion                            | 76  |
|        | 51.79% | G | Carbohydrate transport and metabolism                       | 95  |
|        | 51%    | E | Amino acid transport and metabolism                         | 139 |
|        | 55.68% | F | Nucleotide transport and metabolism                         | 59  |
|        | 52.50% | H | Coenzyme metabolism                                         | 92  |
|        | 50.11% | I | Lipid metabolism                                            | 40  |
|        | 45.27% | Q | Secondary metabolite biosynthesis, transport and catabolism | 26  |
| 47.19% | 46.80% | R | General function prediction only                            | 138 |
|        | 47.97% | S | Function unknown                                            | 69  |

**Average species coverage**

(E.coli groups only, number of species covered including E.coli)

ecoli  
groups

|       |       |   |                                                             |     |
|-------|-------|---|-------------------------------------------------------------|-----|
| 56.55 | 72.08 | J | Translation, ribosomal structure and biogenesis             | 217 |
|       | 43.69 | K | Transcription                                               | 133 |
|       | 47.54 | L | DNA replication, recombination and repair                   | 184 |
| 38.4  | 39.96 | D | Cell division and chromosome partitioning                   | 32  |
|       | 46.19 | O | Posttranslational modification, protein turnover, chaperons | 109 |
|       | 38.49 | M | Cell envelope biogenesis, outer membrane                    | 155 |
|       | 36.05 | N | Cell motility and secretion                                 | 133 |
|       | 37.96 | P | Inorganic ion transport and metabolism                      | 160 |
|       | 32.91 | T | Signal transduction mechanisms                              | 96  |
| 45.31 | 39.73 | C | Energy production and conversion                            | 232 |
|       | 40.33 | G | Carbohydrate transport and metabolism                       | 170 |
|       | 48.41 | E | Amino acid transport and metabolism                         | 233 |
|       | 56.22 | F | Nucleotide transport and metabolism                         | 85  |
|       | 49.22 | H | Coenzyme metabolism                                         | 154 |
|       | 48.61 | I | Lipid metabolism                                            | 75  |
|       | 39.59 | Q | Secondary metabolite biosynthesis, transport and catabolism | 62  |
| 28.35 | 41.19 | R | General function prediction only                            | 449 |
|       | 20.69 | S | Function unknown                                            | 752 |

**Average orthgroup inclusiveness**

(E.coli groups only, genes per species per group)

ecoli  
groups

|      |      |   |                                                             |     |
|------|------|---|-------------------------------------------------------------|-----|
| 2.15 | 1.3  | J | Translation, ribosomal structure and biogenesis             | 217 |
|      | 4.15 | K | Transcription                                               | 133 |
|      | 1.71 | L | DNA replication, recombination and repair                   | 184 |
| 2.2  | 1.24 | D | Cell division and chromosome partitioning                   | 32  |
|      | 1.62 | O | Posttranslational modification, protein turnover, chaperons | 109 |
|      | 1.81 | M | Cell envelope biogenesis, outer membrane                    | 155 |
|      | 1.88 | N | Cell motility and secretion                                 | 133 |
|      | 2.42 | P | Inorganic ion transport and metabolism                      | 160 |
|      | 3.89 | T | Signal transduction mechanisms                              | 96  |
| 2.12 | 1.91 | C | Energy production and conversion                            | 232 |
|      | 2.96 | G | Carbohydrate transport and metabolism                       | 170 |
|      | 2.41 | E | Amino acid transport and metabolism                         | 233 |
|      | 1.3  | F | Nucleotide transport and metabolism                         | 85  |
|      | 1.27 | H | Coenzyme metabolism                                         | 154 |
|      | 1.74 | I | Lipid metabolism                                            | 75  |
|      | 3.25 | Q | Secondary metabolite biosynthesis, transport and catabolism | 62  |
| 1.58 | 2.25 | R | General function prediction only                            | 449 |
|      | 1.18 | S | Function unknown                                            | 752 |
