# Supplementary material
Source: PubMed Central journal article supplement (PMC307584)

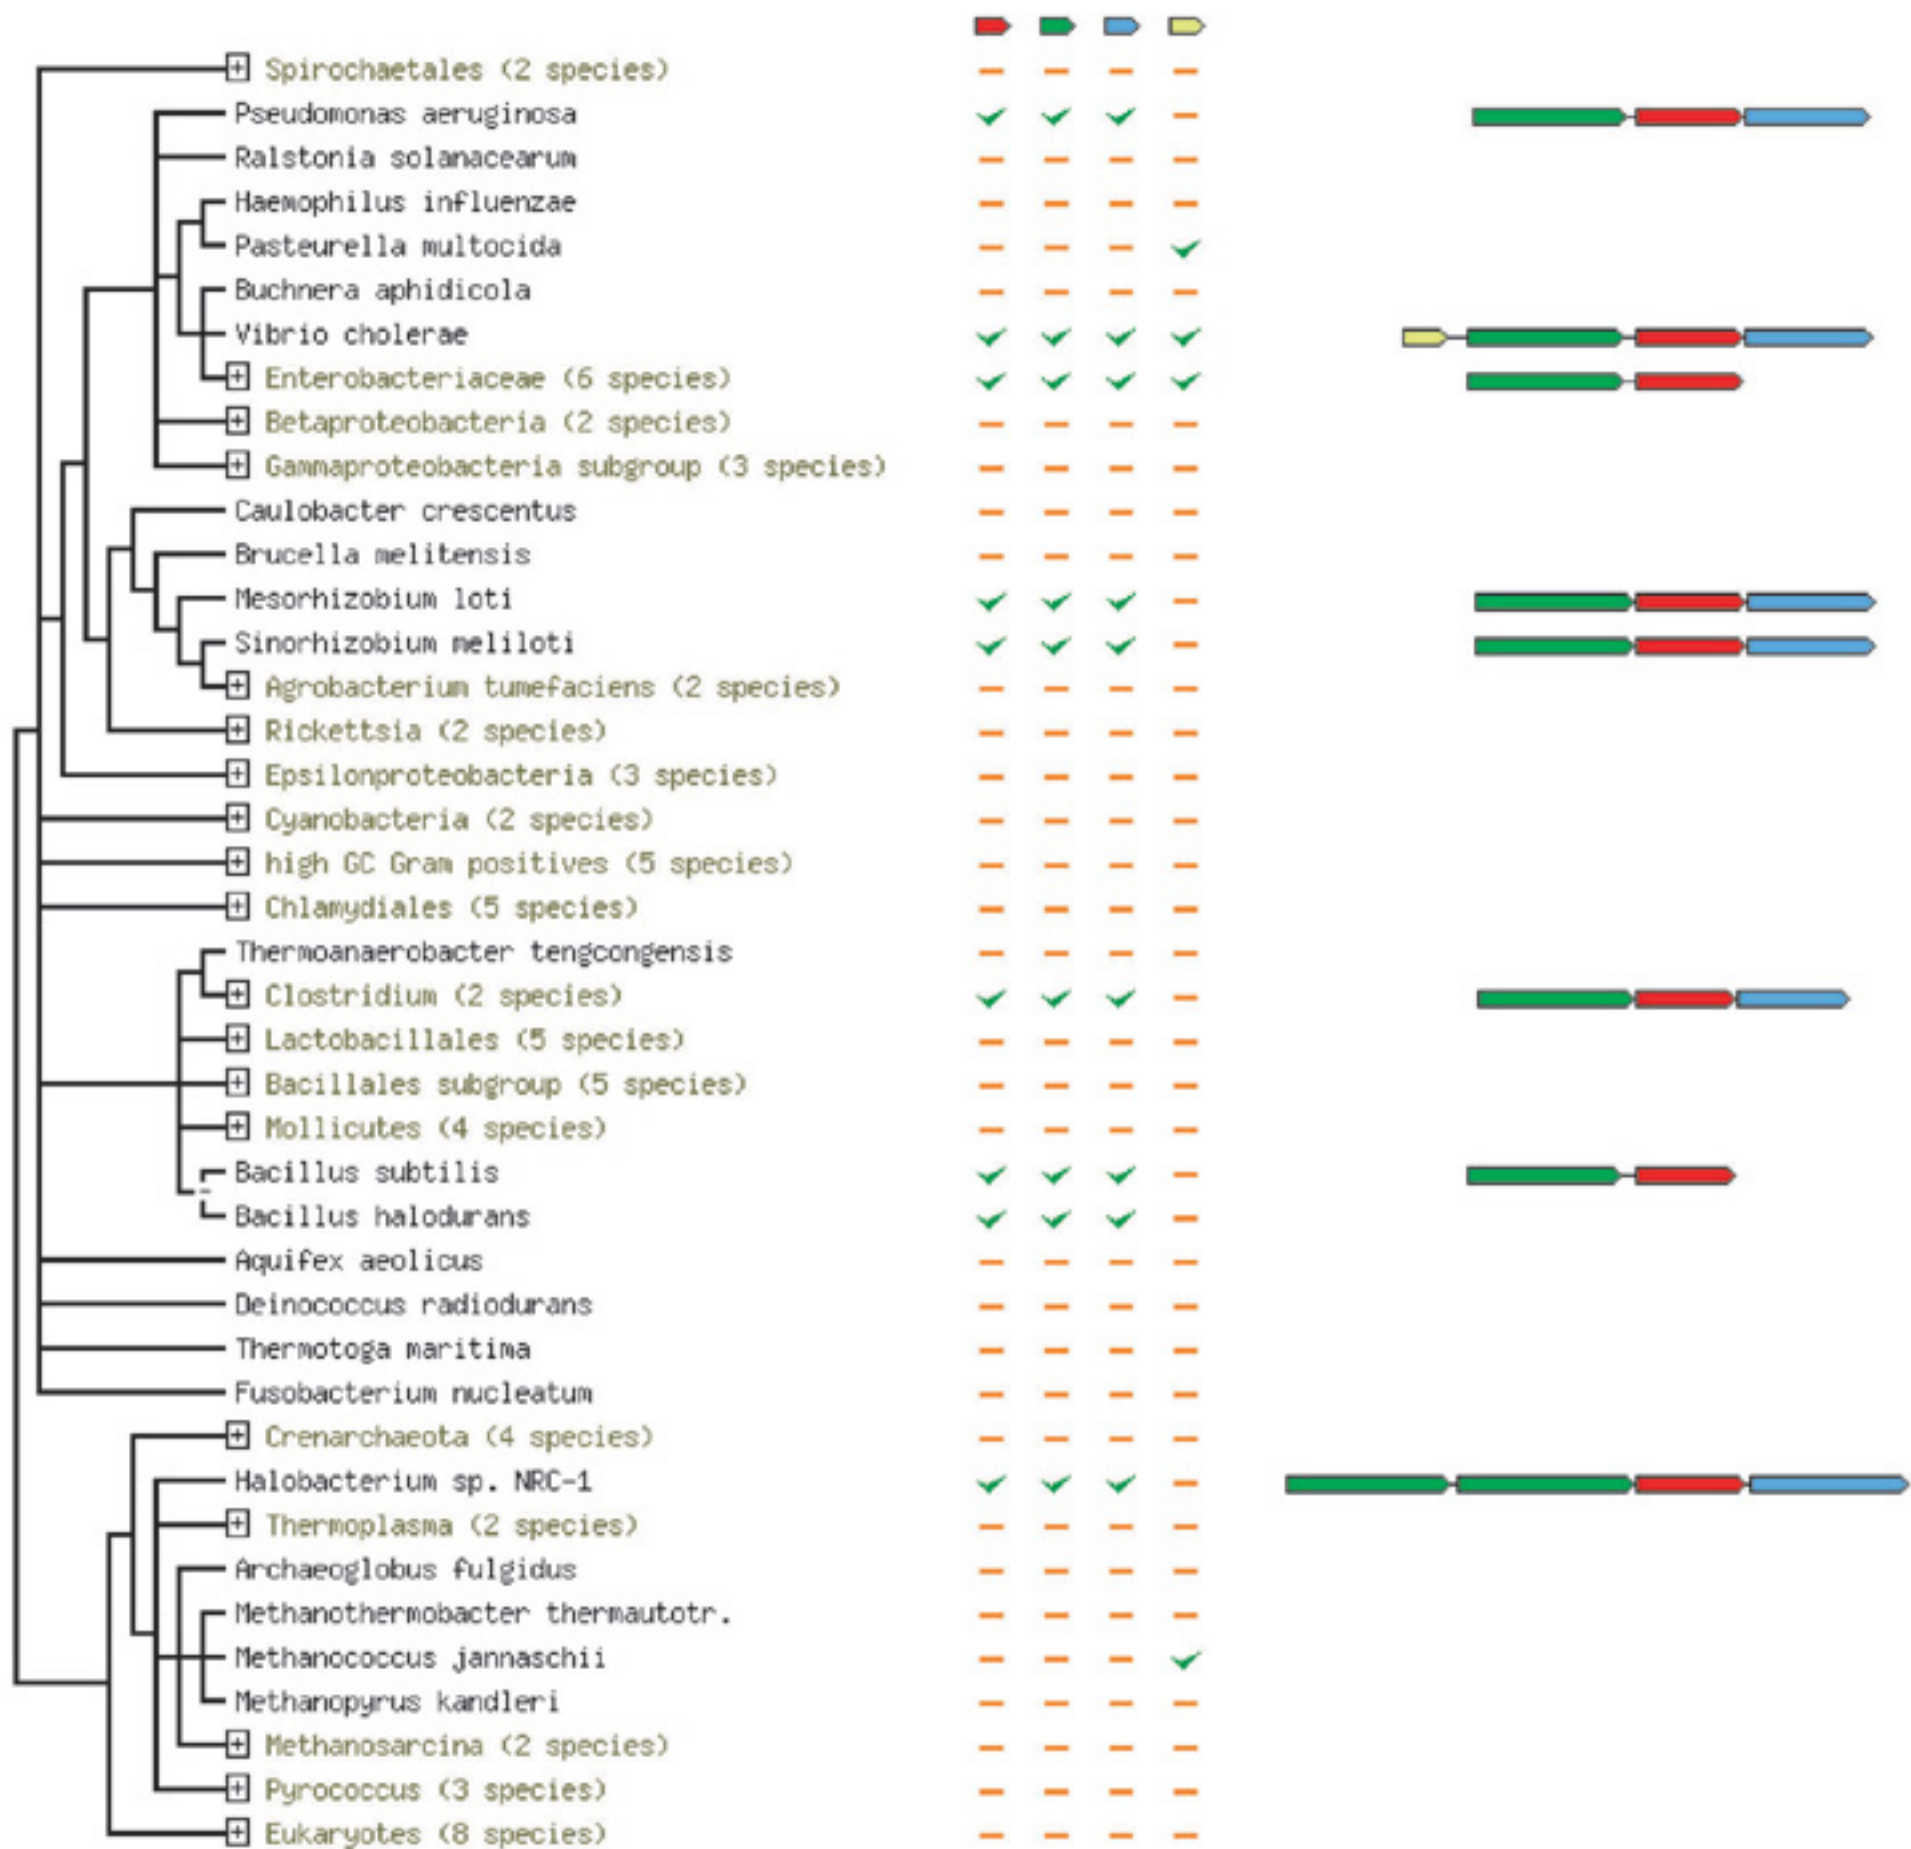

 COG2718 - YeaH and orthologs  
 COG2766 - YeaG and orthologs  
 COG2719 - YcgB and orthologs  
 COG3013 - YfbU and orthologs

Supplement: pnas_100_26_15428__9.pdf [file pnas_100_26_15428__9.pdf]
